# Supplementary material for: The rigidity of self-assembled cofacial porphyrins influences selectivity and kinetics of oxygen reduction electrocatalysis
Source: Royal Society of Chemistry journal article supplement (doi:10.1039/d2dt02724k), 2022-01-01
Supplement: d2dt02724k1.pdf [file d2dt02724k1.pdf]

# The Rigidity of Self-Assembled Cofacial Porphyrins Influences Selectivity and Kinetics of Oxygen Reduction Electrocatalysis

Daoyang Zhang,<sup>a</sup> Matthew R. Crawley,<sup>a</sup> Ming Fang,<sup>a</sup> Lea J. Kyle,<sup>a</sup> and Timothy R. Cook<sup>\*,a</sup>

<sup>a</sup>Department of Chemistry, University at Buffalo, The State University of New York, Buffalo,  
New York 14260, United States  
Email: trcook@buffalo.edu

## Supplementary Information

### Contents

|                                                |    |
|------------------------------------------------|----|
| Experimental Procedures: .....                 | 2  |
| Materials:.....                                | 2  |
| Synthesis Procedure for metalloporphyrin:..... | 2  |
| 5-Methyl-2,2'-bipyridine:.....                 | 2  |
| 2,2'-Bipyridinyl-5-carboxylic acid:.....       | 2  |
| Ethyl 2,2'-Bipyridinyl-5-carboxylate:.....     | 3  |
| 2,2'-Bipyridinyl-5-methanol.....               | 3  |
| 2,2'-Bipyridinyl-5-carboxaldehyde:.....        | 3  |
| Tetrakis(bipyridyl) porphyrin: .....           | 3  |
| Zn <sub>2</sub> Ag <sub>4</sub> prism: .....   | 4  |
| Co(II) tetrakis(bipyridyl) porphyrin: .....    | 4  |
| Co <sub>2</sub> Ag <sub>4</sub> prism: .....   | 4  |
| Spectroscopic characterization:.....           | 5  |
| <sup>1</sup> H NMR spectroscopy .....          | 5  |
| Mass spectrometry: .....                       | 9  |
| Electrochemical Experiments: .....             | 11 |
| UV-vis study: .....                            | 14 |
| KL-analysis: .....                             | 15 |
| KL analysis detail:.....                       | 16 |
| Computational Details: .....                   | 17 |
| Reference: .....                               | 27 |

## Experimental Procedures:

### Materials:

Chemicals were purchased from commercial sources and used as received unless otherwise noted below. Solvents were purified using a solvent-drying system (Pure Process Technology).  $^1\text{H}$  NMR spectra were acquired on Varian 300, 400, or 500 MHz spectrometers. Chemical shifts ( $\delta$ ) are reported in parts per million (ppm) and referenced against the residual proton resonance of the deuterated solvent. Mass spectra were recorded using the Agilent 6530 Q-TOF mass spectrometer. No precautions were taken to exclude air ( $\text{O}_2$  or water) from self-assembly reactions.  $\text{Ag}(\text{bpy})_2\text{OTf}$  was synthesized by following a literature procedure.<sup>1</sup>

### Synthesis Procedure for metalloporphyrin:

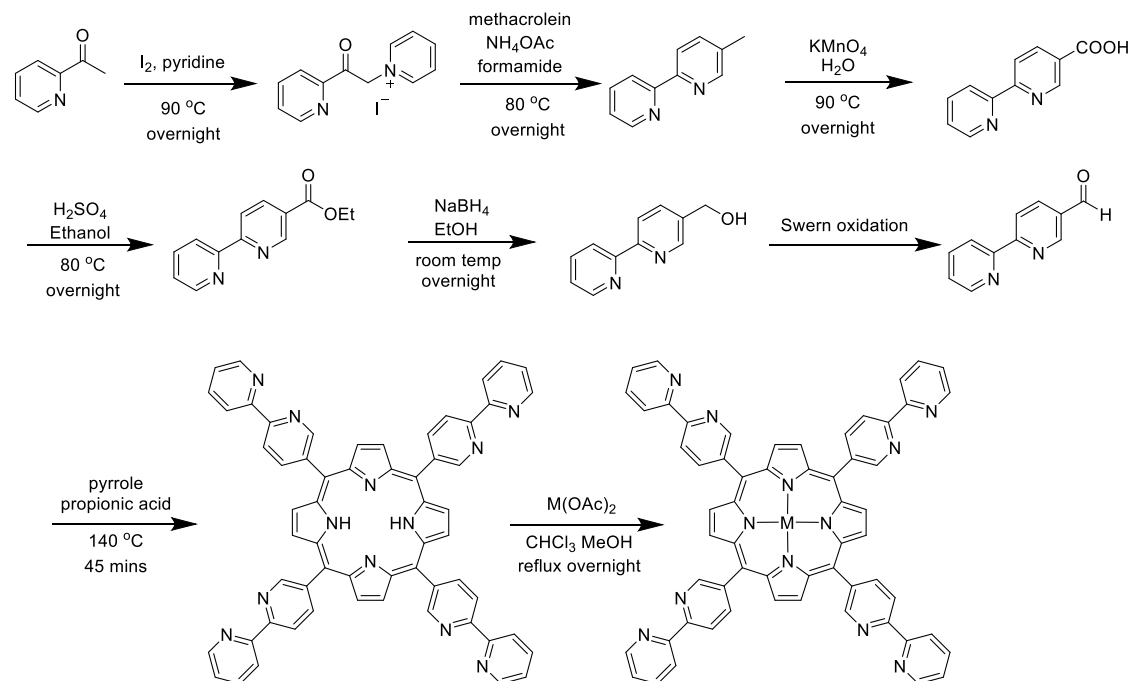

### 5-Methyl-2,2'-bipyridine:

A solution of iodine (14.2 g, 56.0 mmol) and 2-acetylpyridine (5.6 mL, 50.0 mmol) in pyridine (60 mL) was prepared in a reaction flask equipped with a condenser and drying tube, and the reaction mixture was stirred for 6 h at  $90\text{ }^\circ\text{C}$ . At this time, the resulting suspension was filtered as brown solid, the crude product was used without purification. Methacrolein (3.6 mL, 44.0 mmol) and  $\text{H}_4\text{NOAc}$  (18.6 g, 240.0 mmol) were sequentially added to the solution of the brown solid (13.0 g) in formamide (100 mL). The mixture was stirred at  $80\text{ }^\circ\text{C}$  for 16 h. At this time, the crude mixture was cooled and extracted with diethyl ether ( $3 \times 200\text{ mL}$ ). The combined organic layers were washed with brine (200 mL), dried over  $\text{MgSO}_4$ , filtered, and concentrated under reduced pressure. The crude product was purified by column chromatography (5% MeOH in  $\text{CH}_2\text{Cl}_2$ ) to yield 5-Methyl-2,2'-bipyridine (7.0 g, 82.0%) as a brown oil.

### 2,2'-Bipyridinyl-5-carboxylic acid:

Potassium permanganate (24.6 g, 156 mmol) was added in 7 portions at 1 h intervals to a solution of 5-Methyl-2,2'-bipyridine (6.8 g, 40 mmol) in water (200 mL). The mixture was heated at  $70\text{ }^\circ\text{C}$  overnight until all the Potassium permanganate turn brown. The brown mixture was then filtered while hot

through celite and washed with hot water (2 × 25 mL). The filtrate was concentrated to approximately 10 mL under reduced pressure, and then 1 M HCl was added slowly until a pH of 4 was obtained. The residue was then filtered and dried to obtain pure product (5.8 g, 73.4%) as a white solid.

#### Ethyl 2,2'-Bipyridinyl-5-carboxylate:

Concentrated sulfuric acid (20 mL) was added to a solution of 2,2'-Bipyridinyl-5-carboxylic acid (5.8 g, 29 mmol) in ethanol (50 mL). The reaction mixture was stirred at 70 °C, the reaction progress was monitored by LTQ-MS, after 48 hours, the mixture was concentrated under reduced pressure, and a NaHCO<sub>3</sub> solution was added to the mixture to neutralize the acid. The product was then extracted with ethyl acetate (3 × 100 mL), and the combined organic fractions were washed with brine, dried over MgSO<sub>4</sub>, filtered, and concentrated under reduced pressure to obtain pure product (3.9 g, 59.0%) as a white solid.

#### 2,2'-Bipyridinyl-5-methanol

Sodium borohydride (1.1 g, 30 mmol) was added to ethyl 2,2'-Bipyridinyl-5-carboxylate (1.37 g, 6 mmol) in ethanol (50 mL). The mixture was stirred at room temperature for about 24 hours and monitored by LTQ-MS, then concentrated under reduced pressure. Water (50 mL) was added, and then the crude product was extracted with ethyl acetate (3 × 50 mL). The combined organic layers were washed with brine (50 mL), dried over MgSO<sub>4</sub>, filtered, and concentrated under reduced pressure to obtain as brown oil as product quantitatively.

#### 2,2'-Bipyridinyl-5-carboxaldehyde:

To a solution of (COCl)<sub>2</sub> (0.94 mL, 12.0 mmol) in CH<sub>2</sub>Cl<sub>2</sub> (14.0 mL) was added dry DMSO (1.70 mL, 24 mmol) at -78 °C. After stirring for 30 min, 2,2'-Bipyridinyl-5-methanol (0.93 g, 10.0 mmol) was added, and the reaction mixture was stirred for 1 h at the same temperature. Then, to the mixture was added triethylamine (6.4 mL, 48 mmol), and the resulting mixture was warmed to room temperature. After stirring for 1 h, the reaction was quenched by addition of water, and the mixture was extracted with CH<sub>2</sub>Cl<sub>2</sub>. The extract was washed with water and brine, dried, and concentrated to dryness to yield 0.83 g brownish yellow oil as crude product, NMR was acquired to identify the purity and the product was used without further purification.

#### Tetrakis(bipyridyl) porphyrin:

The purity of aldehyde was obtained by <sup>1</sup>H NMR, as shown is Figure S5, the peak at 10.2 ppm was attribute to the aldehyde CHO, and the peak at 4.85 ppm was attributed to the methanol CH<sub>2</sub> peak, based on the peak integration, the aldehyde was around 75% purity, since alcohol group doesn't involve into any reaction during the porphyrin synthesis, the crude product was directly used with further purification.

Pyrrole was distilled under reduced pressure before use. A 1 L round-bottom flask was equipped with a reflux condenser and a magnetic stirring bar. 2,2'-bipyridine-5-carbaldehyde (0.736 g, 3.0 mmol, 1.0 eq, 75% purity) and propionic acid (70 mL) to the flask were added. The mixture was heated at 140 °C. Pyrrole (0.221 g, 3.3 mmol, 1.1 eq) was then dissolved in propionic acid (5 mL) and added to the solution. The reaction mixture was heated at 140 °C for 45 min under aerobic and ambient-light conditions, cooled to room temperature and evaporate the solvent under reduced pressure. The black solid was washed by N,N-dimethylformamide and methanol to obtain the product as purple solid (136 mg, 19.6%).

#### Zn(II) tetrakis(bipyridyl) porphyrin:

Free-base porphyrin (50 mg, 0.054 mmol, 1.0 eq),  $\text{CHCl}_3$  (30 mL) and  $\text{CH}_3\text{OH}$  (5 mL) were placed in a 50 mL round-bottom flask. To the clear, red solution was added zinc acetate dihydrate (50 mg 0.27 mmol, 5.0 eq) dissolved in  $\text{CH}_3\text{OH}$  (3 mL). The solution was stirred at room temperature for 16 h under the dark to give clear, purple solution. The solution was transferred to separating funnel, washed with 50 mM EDTA·2Na aqueous solution (20 mL × 3) and with  $\text{H}_2\text{O}$  (20 mL × 3). The combined organic phase was dried over  $\text{Na}_2\text{SO}_4$ , filtered and evaporated to obtain crude 1 as a reddish purple solid (44 mg, 81%).

#### $\text{Zn}_2\text{Ag}_4$ prism:

To a solution of Co-porphyrin (75 mg, 0.076 mmol, 1.0 equiv.) in a mixture of  $\text{CHCl}_3$  (20 mL) and  $\text{CH}_3\text{OH}$  (20 mL) was added a solution of  $\text{Ag}(\text{OTf})$  (38.9 mg, 0.15 mmol, 2.0 equiv.) in a round bottom flask, diethyl ether was carefully layered. Let the reaction sit overnight, and the solid was collected by centrifuge, the washed with diethyl ether, (113 mg, quant.).

Elemental Analysis (%) calcd for  $\text{C}_{124}\text{H}_{72}\text{Ag}_4\text{Zn}_2\text{F}_{12}\text{N}_{24}\text{O}_{12}\text{S}_4 \cdot 3\text{CHCl}_3$ : C 45.31, H 2.25, N 9.99; found: C 44.76, H 2.42, N 9.74.

#### Co(II) tetrakis(bipyridyl) porphyrin:

Free-base porphyrin (50 mg, 0.054 mmol, 1.0 eq),  $\text{CHCl}_3$  (30 mL) and  $\text{CH}_3\text{OH}$  (5 mL) were placed in a 50 mL round-bottom flask. To the clear, red solution was added cobalt acetate tetrahydrate (67 mg 0.27 mmol, 5.0 eq) dissolved in  $\text{CH}_3\text{OH}$  (3 mL). The solution was stirred at room temperature for 16 h under the dark to give clear, purple solution. The solution was transferred to separating funnel, washed with 50 mM EDTA·2Na aqueous solution (20 mL × 3) and with  $\text{H}_2\text{O}$  (20 mL × 3). The combined organic phase was dried over  $\text{Na}_2\text{SO}_4$ , filtered and evaporated to obtain crude 1 as a reddish purple solid (48 mg, 89%).

LTQ-MS:  $m/z = 984.621$ , corresponding to  $[\text{M}+\text{H}]^{1+}$ ,  $m/z = 492.995$ , corresponding to  $[\text{M}+2\text{H}]^{2+}$ ,

#### $\text{Co}_2\text{Ag}_4$ prism:

To a solution of Co-porphyrin (22.4 mg, 0.024 mmol, 1.0 equiv.) in a mixture of  $\text{CH}_2\text{Cl}_2$  (5.0 mL) and  $\text{CH}_3\text{OH}$  (5.0 mL) was added a solution of  $\text{Ag}(\text{OTf})$  (12.3 mg, 0.048 mmol, 2.0 equiv.) in a 20 mL vial, diethyl ether was carefully layered. Let the reaction sit overnight, and the solid was collected by centrifuge, the washed with diethyl ether, (34.5 mg, quant.).

Elemental Analysis (%) calcd for  $\text{C}_{124}\text{H}_{72}\text{Ag}_4\text{Co}_2\text{F}_{12}\text{N}_{24}\text{O}_{12}\text{S}_4 \cdot 12\text{CH}_2\text{Cl}_2$ : C 40.69, H 2.41, N 8.37; found: C 40.60, H 2.36, N 8.82.

HR-MS:  $m/z = 1348.9965$ , corresponding to  $[\text{M}-2\text{OTf}]^{2+}$ ,  $m/z = 1369.0182$ , corresponding to  $[\text{M}-2\text{OTf} + \text{ACN}]^{2+}$ , and  $m/z = 863.0297$ , corresponding to  $[\text{M}-3\text{OTf} + \text{ACN}]^{3+}$

UV-Vis (ACN): soret band  $\lambda_{\text{max}} = 433$  nm, Q bands  $\lambda_{\text{max}} = 531, 587$  nm.

Spectroscopic characterization:

$^1\text{H}$  NMR spectroscopy

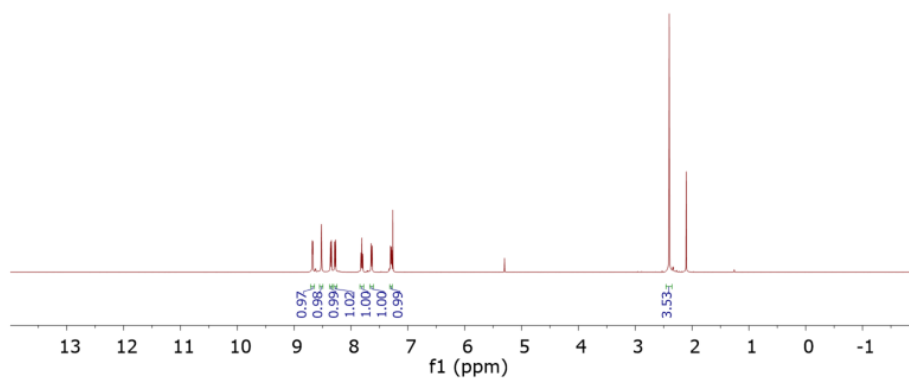

Figure S1  $^1\text{H}$  NMR spectrum of 5-Methyl-2,2'-bipyridine ( $\text{CDCl}_3$ , 500 MHz, 298 K).

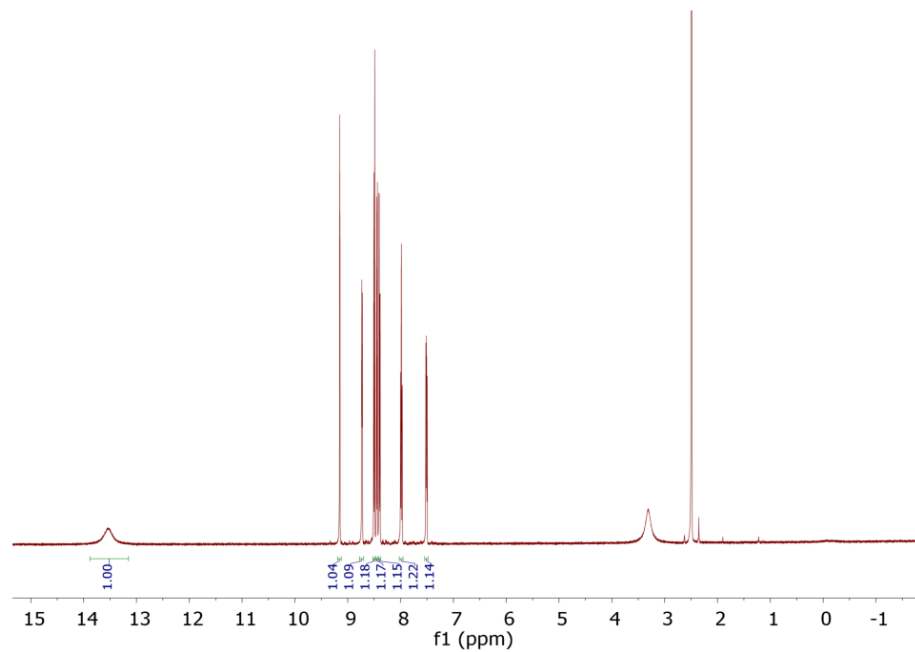

Figure S2.  $^1\text{H}$  NMR spectrum of 2,2'-Bipyridinyl-5-carboxylic acid ( $\text{DMSO}$ , 500 MHz, 298 K).

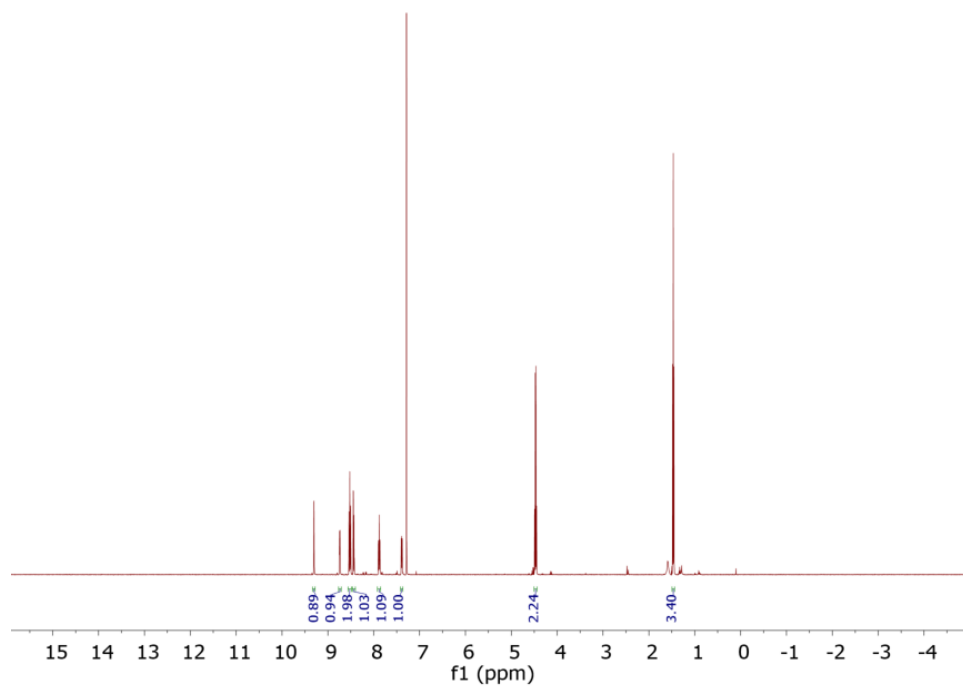

Figure S3. <sup>1</sup>H NMR spectrum of Ethyl 2,2'-Bipyridinyl-5-carboxylate (CDCl<sub>3</sub>, 500 MHz, 298 K).

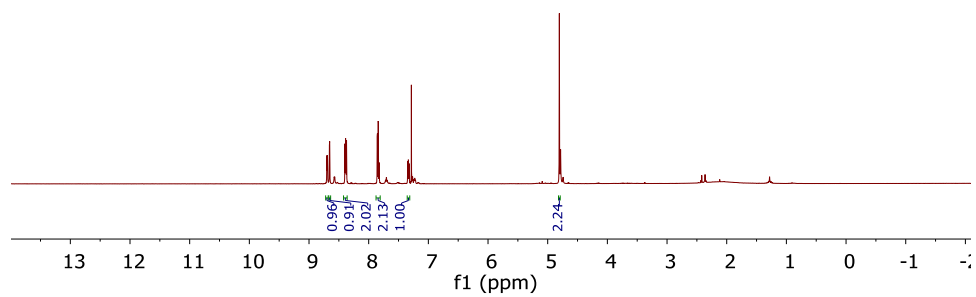

Figure S4. <sup>1</sup>H NMR spectrum of 2,2'-Bipyridinyl-5-methanol (CDCl<sub>3</sub>, 500 MHz, 298 K).

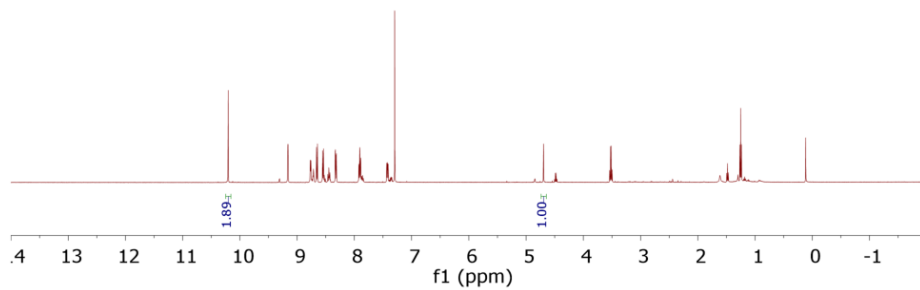

Figure S5.  $^1\text{H}$  NMR spectrum of 2,2'-bipyridine-5-carbaldehyde ( $\text{CDCl}_3$ , 500 MHz, 298 K).

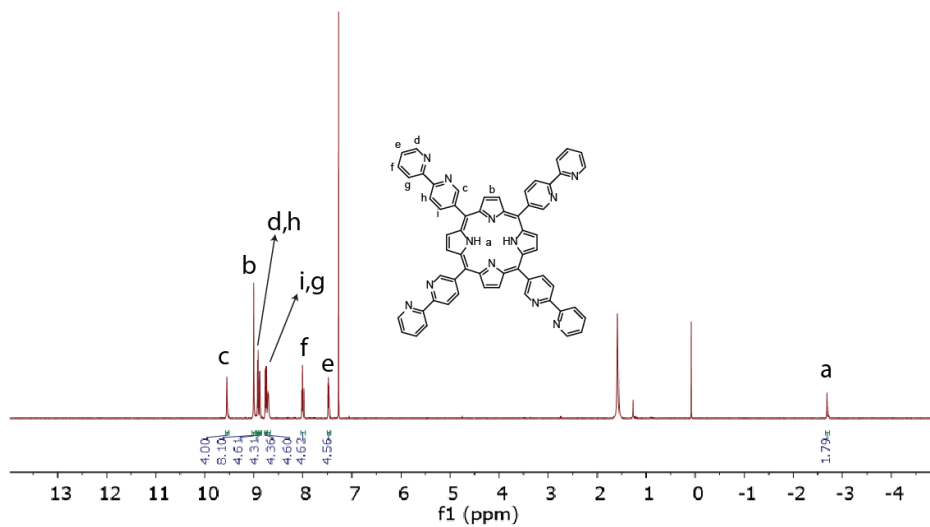

Figure S6.  $^1\text{H}$  NMR spectrum of tetrakis(bipyridyl) porphyrin ( $\text{CDCl}_3$ , 500 MHz, 298 K).

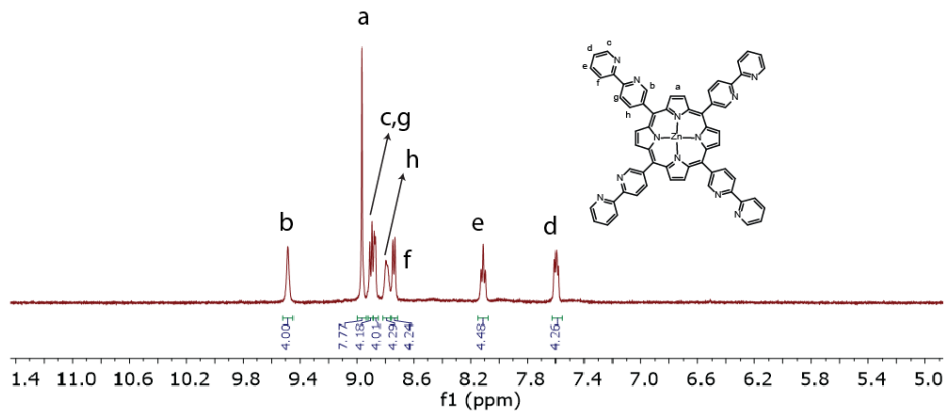

Figure S7.  $^1\text{H}$  NMR spectrum of Zn tetrakis(bipyridyl) porphyrin (DMSO, 500 MHz, 298 K).

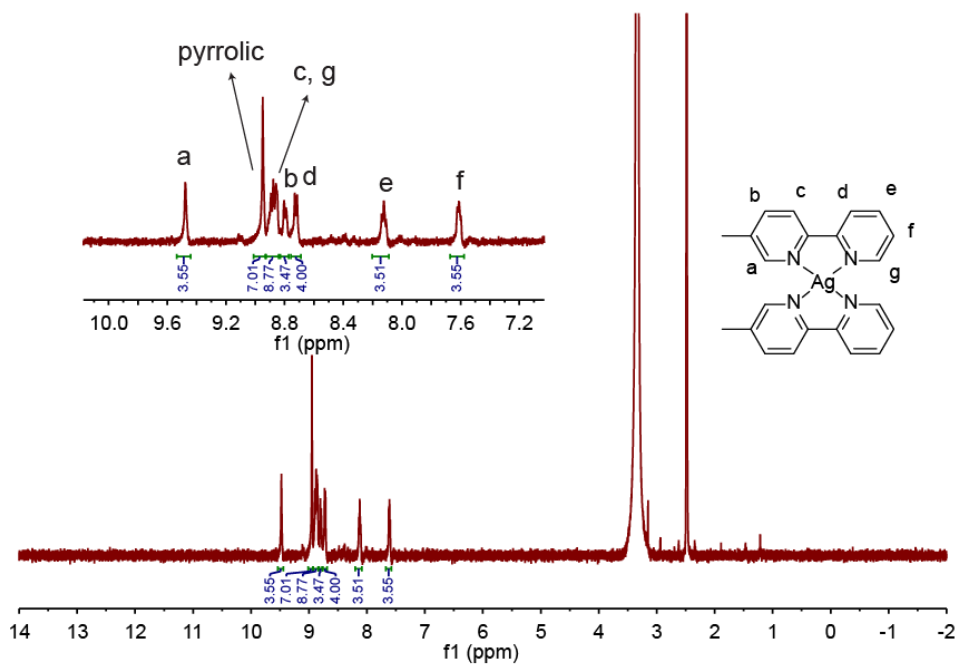

Figure S8.  $^1\text{H}$  NMR spectrum of  $\text{Zn}_2\text{Ag}_4$  prism (DMSO, 500 MHz, 298 K).



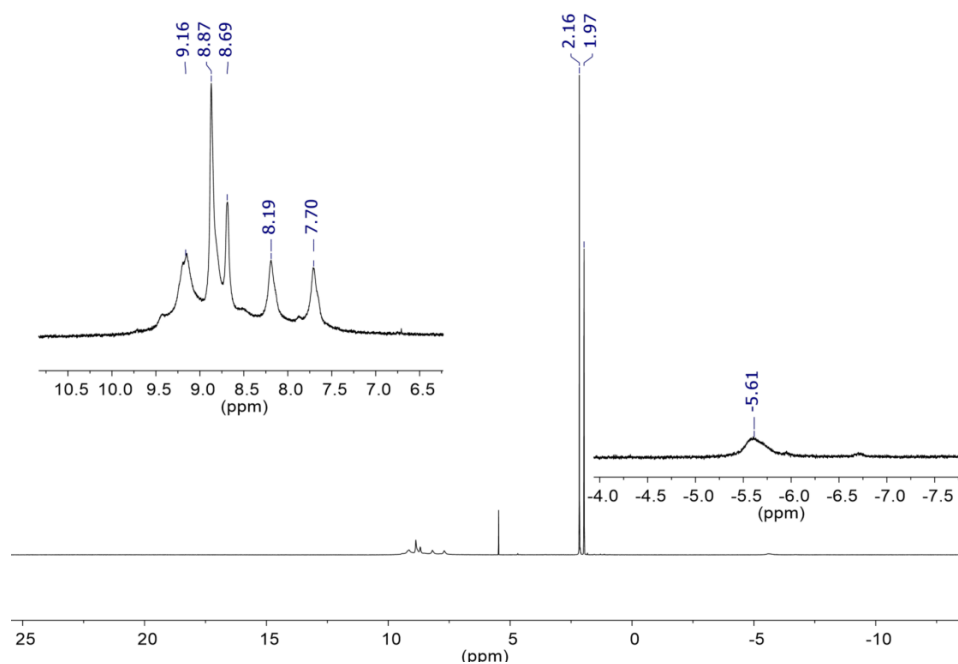

Figure S9.  $^1\text{H}$  NMR spectrum of  $\text{Co}_2\text{Ag}_4$  prism ( $\text{CD}_3\text{CN}$ , 500 MHz, 298 K).

### Mass spectrometry:

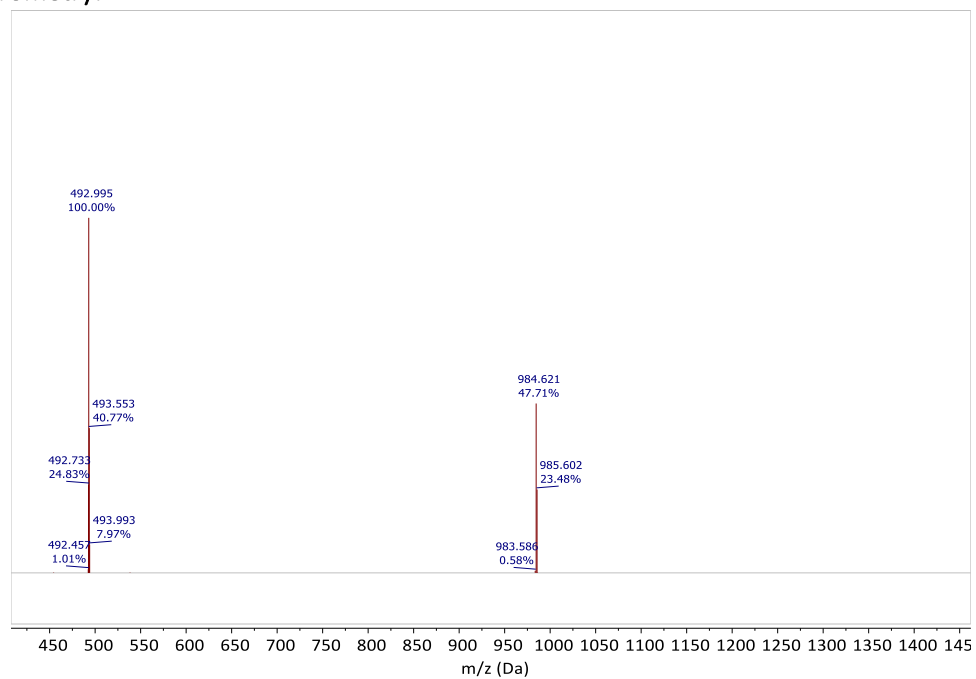

Figure S10. LTQ-MS of  $\text{Co}$  tetrakis(bipyridyl) porphyrin,  $m/z$  =984.621 was attributed to the  $M+\text{H}^+$ .

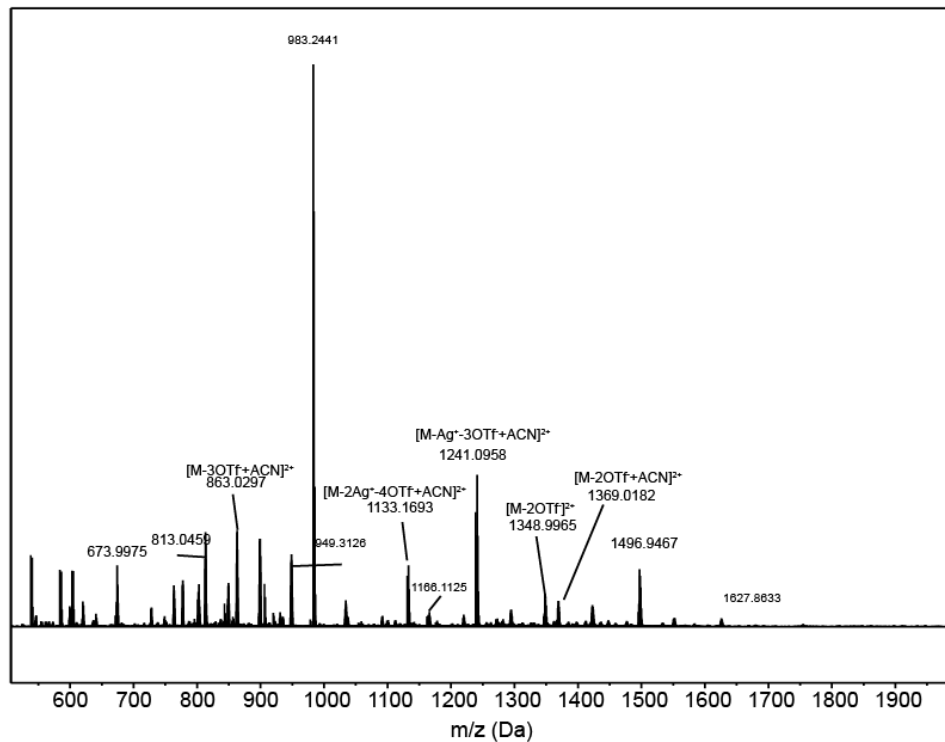

Figure S11. Mass spectrometry of  $\text{Co}_2\text{Ag}_4$  prism

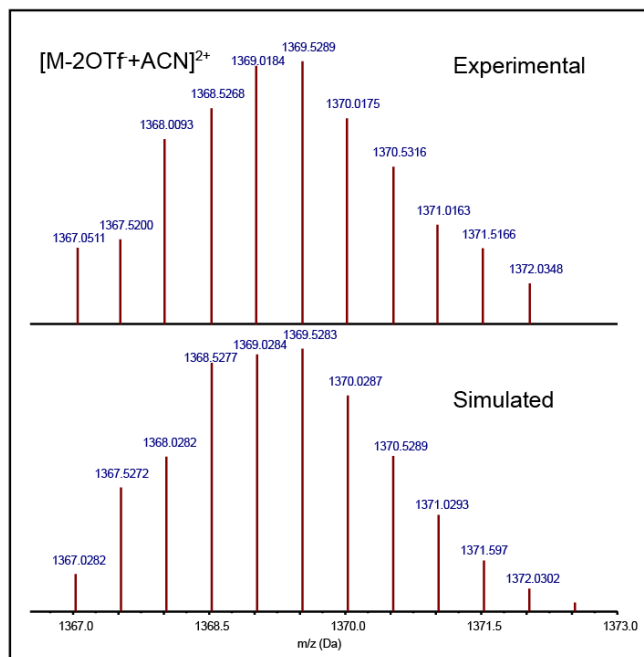

Figure S12. The  $2+$  base peak for  $\text{Co}_2\text{Ag}_4$  prism in Figure 11 corresponding (top) Experimental data, (bottom) simulated spectrum with loss of 2 OTf<sup>-</sup> counterions and addition of an acetonitrile  $[\text{M}-2\text{OTf}+\text{ACN}]^{2+}$ .

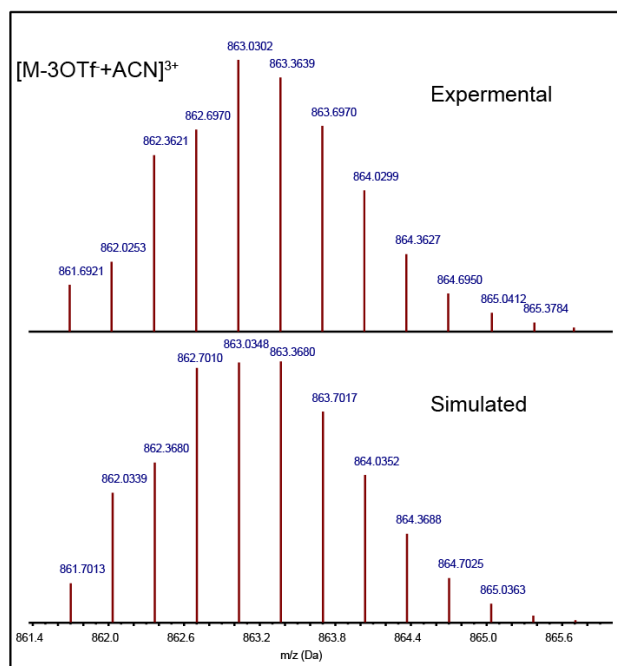

Figure S13. The 3+ base peak  $\text{Co}_2\text{Ag}_4$  prism in Figure S11 corresponding (top) Experimental data, (bottom) simulated spectrum with loss of 2  $\text{OTf}^-$  counterions and addition of an acetonitrile  $[\text{M}-3\text{OTf}+\text{ACN}]^{3+}$ .

#### Electrochemical Experiments:

The CVs of  $\text{Co}_2\text{Ag}_4$  prism and  $\text{Zn}_2\text{Ag}_4$  prism show an irreversible oxidization wave at  $\sim 0$  V vs  $\text{Fc}^+/\text{Fc}$ . The CV of  $[\text{Ag}(\text{bpy})_2]\text{OTf}$  has a similar oxidation feature at the same potential, thus we ascribe this redox event to the Ag nodes. Although the current response is weak, the  $\text{Co}_2\text{Ag}_4$  prism shows a reduction at ca.  $-1.3$  V vs  $\text{Fc}^+/\text{Fc}$  that is not present in the  $\text{Zn}_2\text{Ag}_4$  prism which we attribute to the  $\text{Co}(\text{II})/\text{Co}(\text{I})$  couple. This cobalt centered reduction is seen in our other cofacial porphyrin prisms.<sup>2</sup>

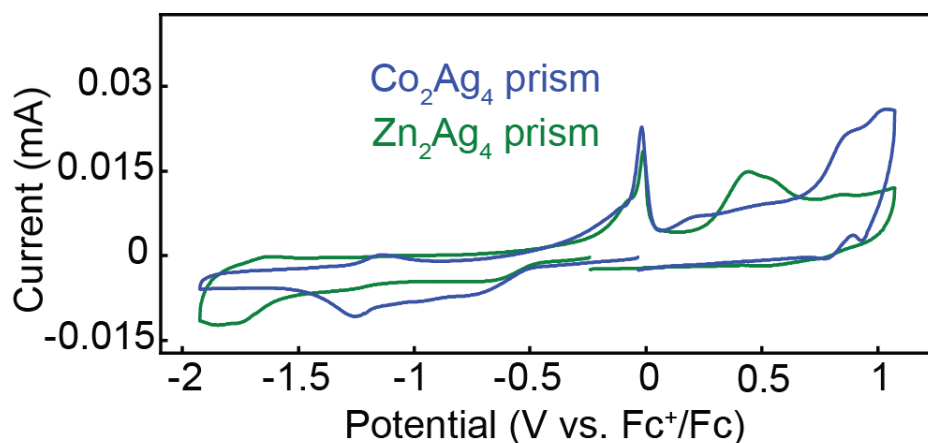

Figure S14. CV of  $\text{Co}_2\text{Ag}_4$  prism and  $\text{Zn}_2\text{Ag}_4$  prism under Nitrogen. Conditions: 100 mM  $\text{TBAPF}_6$  in dry acetonitrile, glassy carbon working electrode, Pt-wire counter electrode, scan rate: 100 mV/sec, scan direction: reduction first.

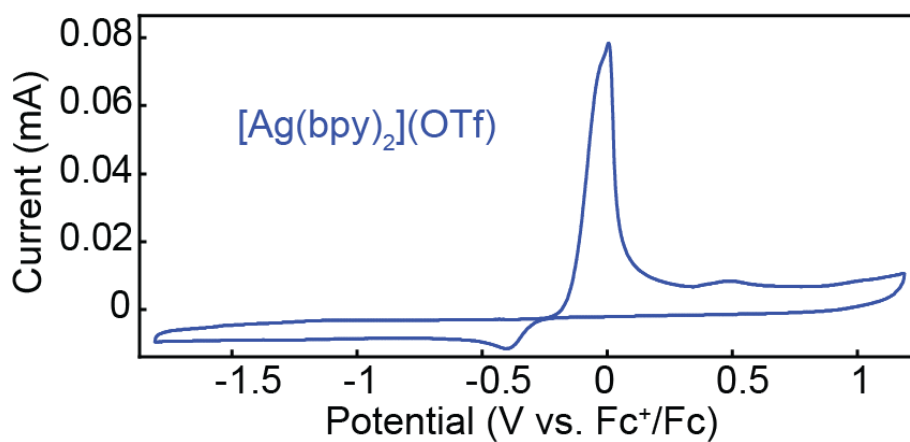

Figure S15. CV of  $Ag(bpy)_2OTf$  under Nitrogen. Conditions: 100 mM  $TBAPF_6$  in dry acetonitrile, glassy carbon working electrode, Pt-wire counter electrode, scan rate: 100 mV/sec, scan direction: reduction first.

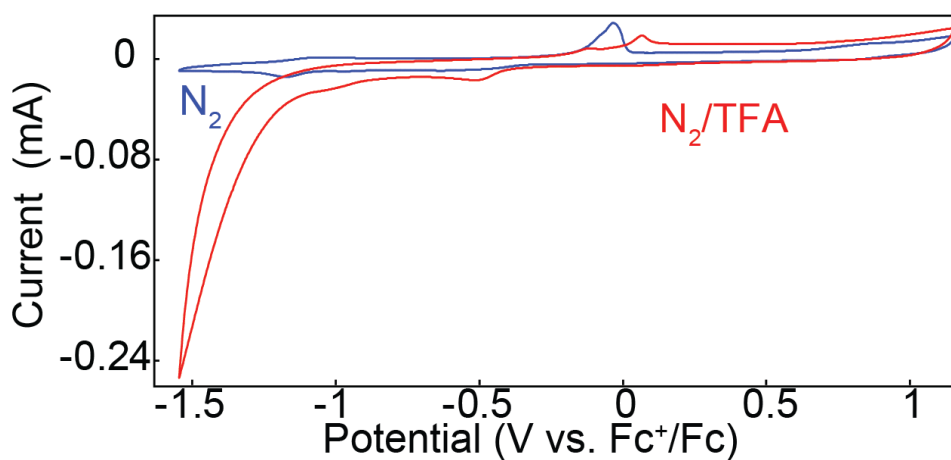

Figure S16. CV of  $Co_2Ag_4$  Prism under Nitrogen and TFA. Conditions: 100 mM  $TBAPF_6$  in dry acetonitrile, glassy carbon working electrode, Pt-wire counter electrode, scan rate: 100 mV/sec, scan direction: reduction first.

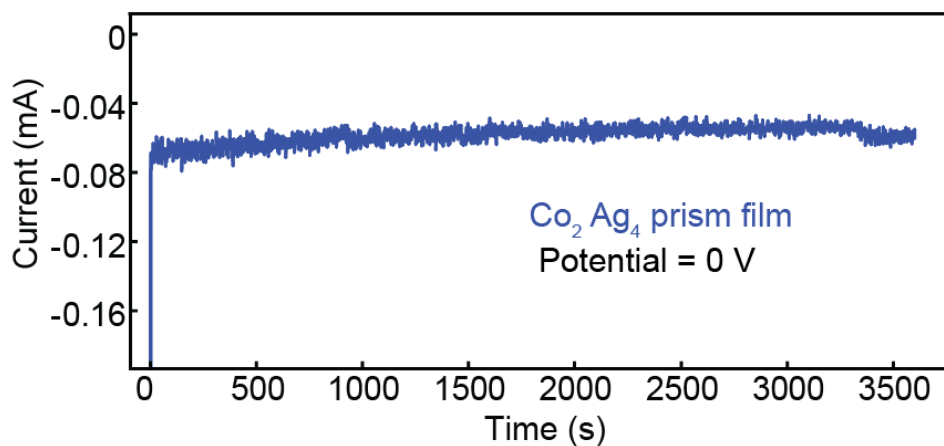

Figure S17. Controlled potential electrolysis (CPE) of  $\text{Co}_2\text{Ag}_4$  prism under heterogeneous condition. Conditions: potential held at 0 V, in 0.5 M  $\text{H}_2\text{SO}_4$  aqueous solution, with saturated oxygen, glassy carbon working electrode, Pt-wire counter electrode. Reference electrode: AgCl in 3 M KCl. Plot Current with time.

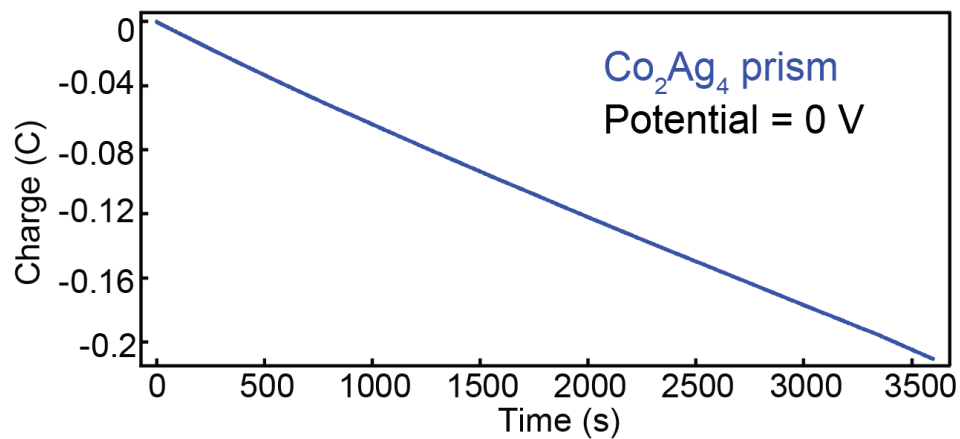

Figure S18. Controlled potential electrolysis (CPE) of  $\text{Co}_2\text{Ag}_4$  prism under heterogeneous condition. Conditions potential held at 0 V, in 0.5 M  $\text{H}_2\text{SO}_4$  aqueous solution, with saturated oxygen, glassy carbon working electrode, Pt-wire counter electrode. Reference electrode: AgCl in 3 M KCl. Plot Charge with time.

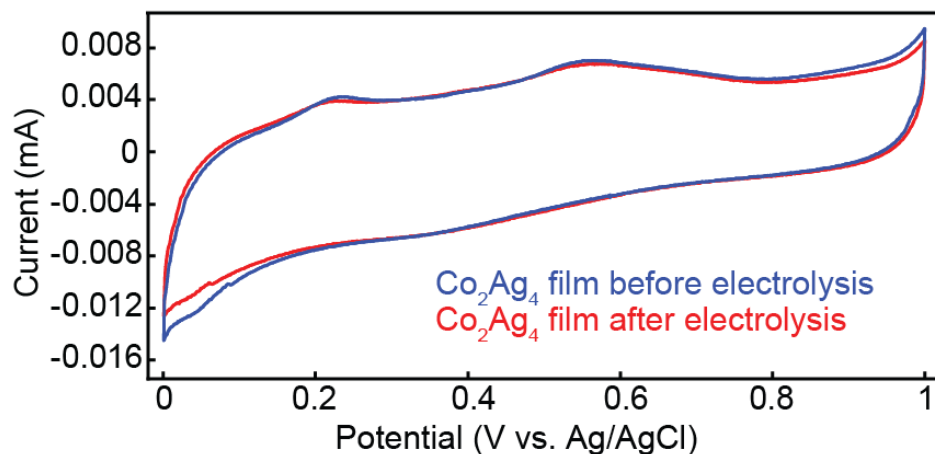

Figure S 19. CV before and after the electrolysis in 0.5 M H<sub>2</sub>SO<sub>4</sub>, in 0.5 M H<sub>2</sub>SO<sub>4</sub> aqueous solution, with saturated oxygen, glassy carbon working electrode, Pt-wire counter electrode. Reference electrode: AgCl in 3 M KCl.

UV-vis study:

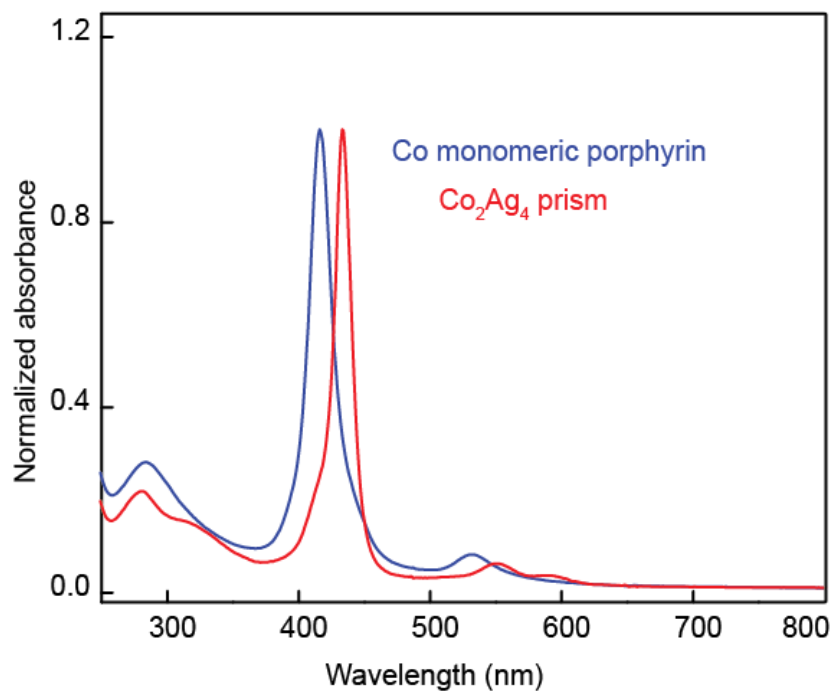

Figure S20. Normalized UV-Vis spectra of monomeric Co porphyrin and Co<sub>2</sub>Ag<sub>4</sub> prism.

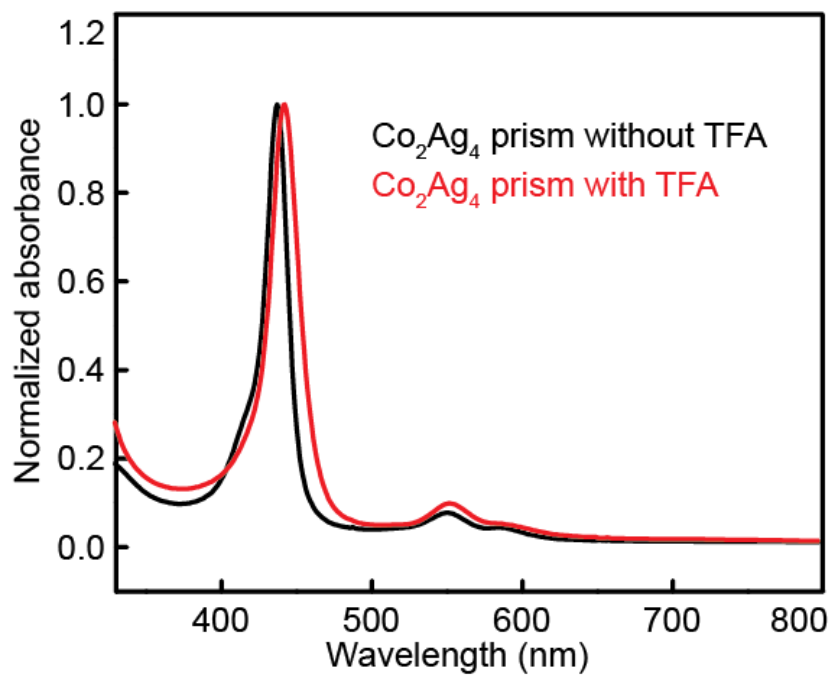

Figure S 21. Normalized UV-Vis spectra of  $\text{Co}_2\text{Ag}_4$  prism in acetonitrile before and after addition of TFA.

KL-analysis:

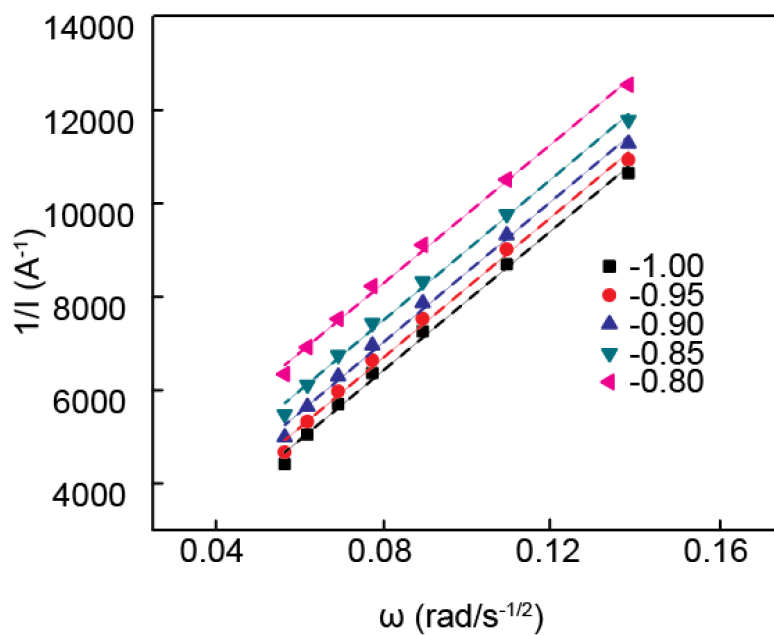

Figure S22. Koutecký-Levich plots of  $\text{Co}_2\text{Ag}_4$  prism

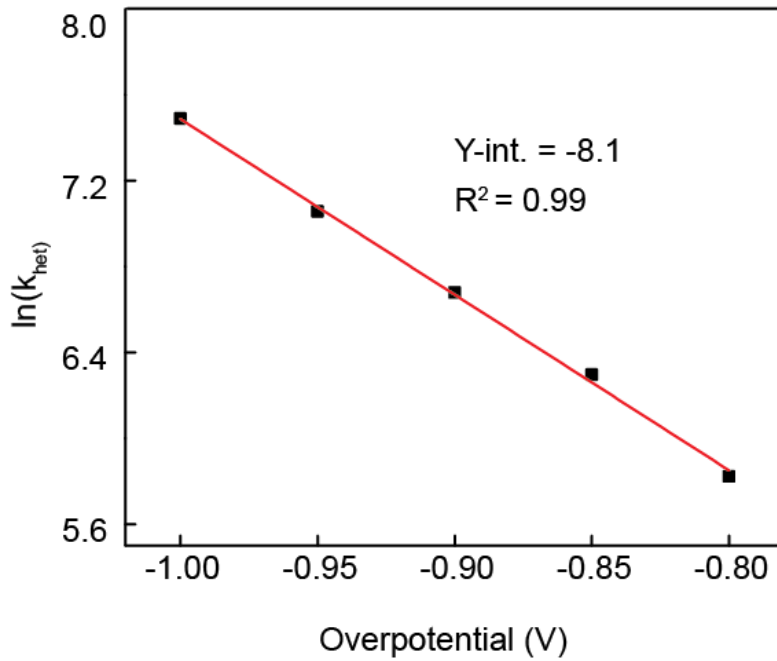

Figure S23. Plot of  $\ln(k_{het})$  vs. overpotential for the  $Co_2Ag_4$  prism. The y-intercept of this plot is  $\ln(k_s)$

#### KL analysis detail:

The rotating disk data for the catalyst was plotted at various overpotentials using the KL equation in which,  $i_{lim}$  is the limiting current (A),  $B$  is the Levich constant,  $\omega$  is the rotation rate (rad/s), and  $i_k$  is the kinetically limited current, select five different data at different overpotential from the LSV data (Figure 4.) at different rotation rate, plot  $\omega$  versus  $1/A$  to obtain KL plot as shown in Figure S22. Koutecký-Levich plots of  $Co_2Ag_4$  prism. Extracted the Y intercept as  $1/i_k$ , then use Equation S2 to obtain the value  $k_{het}$ . Finally, plot the  $\ln(k_{het})$  with overpotential as shown in Figure S23. Plot of  $\ln(k_{het})$  vs. overpotential for the  $Co_2Ag_4$  prism. The y-intercept of this plot is  $\ln(k_s)$  Figure S23. to obtain the y intercept as the standard rate constant values  $k_s$ .

$$\frac{1}{i_{lim}} = \omega^{-1/2} + \frac{i}{i_k} \quad \text{Equation S1.}$$

$$i_k = nFAk_{het}[O_2]\Gamma_{cat} \quad \text{Equation S2.}$$

$$k_{het} = k_s e^{\frac{-a\eta}{RT}} \quad \text{Equation S3.}$$

$$n = 4 - a\left(\frac{\%H_2O_2}{100}\right) \quad \text{Equation S4.}$$



$$\%H_2O_2 = \frac{\frac{2i_{ring}}{N}}{i_{disk} + \frac{i_{ring}}{N}} \times 100$$

Equation S5.

#### Computational Details:

The structure of  $Zn_2Ag_4$  and  $Co_2Ag_4$  prisms were optimized using ORCA 5.0.3 with the B97-3c functional and def2-mTZVP basis set. A frequency calculation was performed at the same level of theory/basis set and was analyzed for imaginary frequencies. After several optimizations from various displaced geometries the imaginary frequency remained.

Coordinates of Zn<sub>2</sub>Ag<sub>4</sub> Optimized Structure:

|    |              |              |              |
|----|--------------|--------------|--------------|
| Ag | -6.333178000 | -6.004808000 | 2.187593000  |
| Ag | -6.287246000 | 6.087647000  | 2.213068000  |
| Zn | -0.022453000 | 0.014979000  | 0.005125000  |
| N  | 2.026159000  | 0.006493000  | 0.017918000  |
| N  | -0.023513000 | 2.064481000  | -0.009945000 |
| N  | -0.039919000 | -2.034275000 | -0.021071000 |
| N  | -2.070251000 | 0.023544000  | -0.052485000 |
| N  | -5.647866000 | -4.801240000 | 4.060254000  |
| N  | -6.811601000 | -7.303241000 | 4.029590000  |
| N  | -7.428269000 | -6.409383000 | 0.248663000  |
| N  | -4.939812000 | -5.198991000 | 0.421210000  |
| N  | -5.594513000 | 4.893650000  | 4.082287000  |
| N  | -6.743224000 | 7.401743000  | 4.055501000  |
| N  | -7.373009000 | 6.502370000  | 0.276259000  |
| N  | -4.891283000 | 5.273350000  | 0.440583000  |
| C  | 2.832061000  | -1.099641000 | -0.092941000 |
| C  | 1.083822000  | 2.871837000  | -0.060777000 |
| C  | 0.665801000  | 4.248906000  | -0.099543000 |
| C  | -1.123196000 | 2.886907000  | -0.061009000 |
| C  | -0.690770000 | 4.256462000  | -0.116605000 |
| C  | -2.452667000 | 2.461718000  | -0.118074000 |
| C  | -2.881623000 | 1.129919000  | -0.066421000 |
| C  | -4.257195000 | 0.710724000  | -0.047141000 |
| C  | -4.262533000 | -0.646494000 | -0.050278000 |
| C  | -2.890347000 | -1.076370000 | -0.071218000 |
| C  | -2.472082000 | -2.411248000 | -0.128648000 |
| C  | -1.146228000 | -2.847519000 | -0.073951000 |
| C  | -0.725159000 | -4.220409000 | -0.133826000 |
| C  | 0.631445000  | -4.224000000 | -0.117336000 |
| C  | 1.060766000  | -2.850508000 | -0.074637000 |
| C  | 2.394396000  | -2.426066000 | -0.137209000 |
| C  | 4.198657000  | -0.679656000 | -0.254432000 |
| C  | 4.204087000  | 0.676698000  | -0.250829000 |
| C  | 2.840914000  | 1.106752000  | -0.087151000 |
| C  | 2.413916000  | 2.436801000  | -0.125181000 |
| C  | -3.882904000 | -3.451623000 | 4.964120000  |
| C  | -4.792623000 | -3.781565000 | 3.967376000  |
| C  | -3.938915000 | -4.193724000 | 6.142240000  |
| C  | -5.679967000 | -5.533685000 | 5.188411000  |
| C  | -4.847254000 | -5.227200000 | 6.261130000  |
| C  | -6.578273000 | -6.703139000 | 5.211143000  |
| C  | -7.140878000 | -7.182244000 | 6.390074000  |
| C  | -7.941395000 | -8.311010000 | 6.349758000  |

|   |              |              |              |
|---|--------------|--------------|--------------|
| C | -7.578181000 | -8.396634000 | 3.999449000  |
| C | -8.157658000 | -8.938854000 | 5.133500000  |
| C | -3.930161000 | -4.343567000 | 0.594161000  |
| C | -3.534159000 | -3.419381000 | -0.366083000 |
| C | -4.214407000 | -3.442893000 | -1.582489000 |
| C | -5.240719000 | -4.344136000 | -1.780885000 |
| C | -5.600216000 | -5.208704000 | -0.750256000 |
| C | -6.751183000 | -6.122857000 | -0.878868000 |
| C | -7.139699000 | -6.650176000 | -2.106701000 |
| C | -8.255650000 | -7.466230000 | -2.174502000 |
| C | -8.963623000 | -7.734616000 | -1.013902000 |
| C | -8.510364000 | -7.190916000 | 0.174852000  |
| C | -3.506487000 | 3.479288000  | -0.351466000 |
| C | -4.191238000 | 3.509070000  | -1.565246000 |
| C | -3.889740000 | 4.407896000  | 0.609894000  |
| C | -4.749258000 | 3.866001000  | 3.986459000  |
| C | -3.839714000 | 3.527048000  | 4.980367000  |
| C | -3.884602000 | 4.270080000  | 6.158431000  |
| C | -4.782306000 | 5.312463000  | 6.279970000  |
| C | -5.616252000 | 5.626649000  | 5.210437000  |
| C | -6.505170000 | 6.803257000  | 5.236795000  |
| C | -7.502202000 | 8.500298000  | 4.028037000  |
| C | -8.069244000 | 9.049891000  | 5.164905000  |
| C | -7.848172000 | 8.423872000  | 6.381219000  |
| C | -7.055463000 | 7.289494000  | 6.418674000  |
| C | -5.556138000 | 5.288673000  | -0.728157000 |
| C | -5.209462000 | 4.420250000  | -1.759973000 |
| C | -6.699152000 | 6.213269000  | -0.852693000 |
| C | -7.084556000 | 6.746874000  | -2.078765000 |
| C | -8.449154000 | 7.292651000  | 0.205154000  |
| C | -8.898902000 | 7.842926000  | -0.981816000 |
| C | -8.193927000 | 7.572030000  | -2.143666000 |
| H | 1.317214000  | 5.104481000  | -0.120698000 |
| H | -1.333826000 | 5.117146000  | -0.172501000 |
| H | -5.112714000 | 1.362575000  | -0.023350000 |
| H | -5.123081000 | -1.291822000 | -0.029755000 |
| H | -1.375395000 | -5.075594000 | -0.191401000 |
| H | 1.275889000  | -5.084765000 | -0.140848000 |
| H | 5.043795000  | -1.331188000 | -0.391716000 |
| H | 5.054430000  | 1.322192000  | -0.384458000 |
| H | -4.824795000 | -3.209551000 | 3.049737000  |
| H | -3.258860000 | -3.969625000 | 6.951938000  |
| H | -4.872932000 | -5.821471000 | 7.161959000  |
| H | -6.978072000 | -6.667097000 | 7.325001000  |

|    |              |              |              |
|----|--------------|--------------|--------------|
| H  | -8.392684000 | -8.692043000 | 7.254579000  |
| H  | -7.716271000 | -8.855959000 | 3.030187000  |
| H  | -8.764017000 | -9.829548000 | 5.060574000  |
| H  | -3.418977000 | -4.390397000 | 1.546976000  |
| H  | -3.943455000 | -2.744408000 | -2.361606000 |
| H  | -5.785836000 | -4.343865000 | -2.712606000 |
| H  | -6.563313000 | -6.447634000 | -2.996923000 |
| H  | -8.565323000 | -7.889272000 | -3.119317000 |
| H  | -9.847908000 | -8.354410000 | -1.024703000 |
| H  | -9.033142000 | -7.370371000 | 1.104095000  |
| H  | -3.930059000 | 2.807925000  | -2.345305000 |
| H  | -3.374246000 | 4.450115000  | 1.560644000  |
| H  | -4.789783000 | 3.294699000  | 3.068779000  |
| H  | -3.204607000 | 4.039114000  | 6.966234000  |
| H  | -4.799056000 | 5.906978000  | 7.180826000  |
| H  | -7.644534000 | 8.957818000  | 3.058490000  |
| H  | -8.669915000 | 9.944605000  | 5.094085000  |
| H  | -8.289892000 | 8.810553000  | 7.288366000  |
| H  | -6.889590000 | 6.775818000  | 7.353858000  |
| H  | -5.758269000 | 4.425038000  | -2.689533000 |
| H  | -6.510448000 | 6.541706000  | -2.969861000 |
| H  | -8.969887000 | 7.473719000  | 1.135183000  |
| H  | -9.778327000 | 8.469625000  | -0.990275000 |
| H  | -8.500912000 | 7.999990000  | -3.087141000 |
| Ag | 5.905190000  | 6.030676000  | 2.453603000  |
| Ag | 5.845283000  | -6.055052000 | 2.439629000  |
| Zn | -0.416236000 | 0.017345000  | 4.637445000  |
| N  | -2.464497000 | 0.030077000  | 4.625789000  |
| N  | -0.419613000 | -2.032360000 | 4.652350000  |
| N  | -0.393775000 | 2.066298000  | 4.663581000  |
| N  | 1.631783000  | 0.004104000  | 4.695729000  |
| N  | 5.203777000  | 4.839310000  | 0.580846000  |
| N  | 6.373146000  | 7.337869000  | 0.613847000  |
| N  | 7.004384000  | 6.423577000  | 4.390210000  |
| N  | 4.510953000  | 5.222030000  | 4.222315000  |
| N  | 5.165613000  | -4.850280000 | 0.566455000  |
| N  | 6.311557000  | -7.359938000 | 0.599653000  |
| N  | 6.935743000  | -6.465312000 | 4.378864000  |
| N  | 4.452840000  | -5.241993000 | 4.205598000  |
| C  | -3.267936000 | 1.137912000  | 4.737119000  |
| C  | -1.528629000 | -2.837387000 | 4.702111000  |
| C  | -1.113624000 | -4.215455000 | 4.739318000  |
| C  | 0.678240000  | -2.857206000 | 4.702913000  |
| C  | 0.242949000  | -4.225929000 | 4.756476000  |

|   |              |              |              |
|---|--------------|--------------|--------------|
| C | 2.008416000  | -2.434887000 | 4.762052000  |
| C | 2.440508000  | -1.104161000 | 4.711553000  |
| C | 3.817116000  | -0.688315000 | 4.694892000  |
| C | 3.825664000  | 0.668881000  | 4.696955000  |
| C | 2.454429000  | 1.102085000  | 4.715521000  |
| C | 2.039186000  | 2.438028000  | 4.771907000  |
| C | 0.714258000  | 2.877193000  | 4.716122000  |
| C | 0.296038000  | 4.251005000  | 4.775426000  |
| C | -1.060560000 | 4.257443000  | 4.758944000  |
| C | -1.492763000 | 2.884872000  | 4.716946000  |
| C | -2.827233000 | 2.463336000  | 4.780833000  |
| C | -4.635420000 | 0.720869000  | 4.898942000  |
| C | -4.643808000 | -0.635484000 | 4.894941000  |
| C | -3.281631000 | -1.068442000 | 4.730869000  |
| C | -2.857645000 | -2.399416000 | 4.767707000  |
| C | 3.437131000  | 3.490933000  | -0.321432000 |
| C | 4.348834000  | 3.819512000  | 0.673967000  |
| C | 3.490430000  | 4.235352000  | -1.498261000 |
| C | 5.233437000  | 5.574011000  | -0.545892000 |
| C | 4.397974000  | 5.269520000  | -1.617076000 |
| C | 6.132674000  | 6.742802000  | -0.568787000 |
| C | 6.689617000  | 7.225987000  | -1.748770000 |
| C | 7.491643000  | 8.353672000  | -1.708190000 |
| C | 7.141268000  | 8.430114000  | 0.644347000  |
| C | 7.715238000  | 8.976343000  | -0.490602000 |
| C | 3.498847000  | 4.369492000  | 4.050271000  |
| C | 3.103344000  | 3.443838000  | 5.009402000  |
| C | 3.786498000  | 3.463621000  | 6.224284000  |
| C | 4.815523000  | 4.361962000  | 6.421859000  |
| C | 5.174677000  | 5.227441000  | 5.391853000  |
| C | 6.328840000  | 6.137774000  | 5.518934000  |
| C | 6.722105000  | 6.661914000  | 6.746605000  |
| C | 7.841161000  | 7.473785000  | 6.813130000  |
| C | 8.547572000  | 7.741170000  | 5.651346000  |
| C | 8.089643000  | 7.200999000  | 4.462813000  |
| C | 3.059900000  | -3.454578000 | 4.997697000  |
| C | 3.735557000  | -3.490558000 | 6.216347000  |
| C | 3.450894000  | -4.377258000 | 4.033997000  |
| C | 4.319344000  | -3.823297000 | 0.659648000  |
| C | 3.409352000  | -3.487680000 | -0.335074000 |
| C | 3.456163000  | -4.232399000 | -1.512007000 |
| C | 4.355234000  | -5.273920000 | -1.631181000 |
| C | 5.188246000  | -5.585517000 | -0.560165000 |
| C | 6.076708000  | -6.762516000 | -0.582946000 |

|   |              |              |              |
|---|--------------|--------------|--------------|
| C | 7.069789000  | -8.459065000 | 0.630257000  |
| C | 7.639101000  | -9.010273000 | -0.504614000 |
| C | 7.421280000  | -8.385563000 | -1.722207000 |
| C | 6.629488000  | -7.250679000 | -1.762838000 |
| C | 5.109639000  | -5.262934000 | 5.378902000  |
| C | 4.753630000  | -4.401415000 | 6.413284000  |
| C | 6.254633000  | -6.184795000 | 5.505531000  |
| C | 6.635020000  | -6.723311000 | 6.731024000  |
| C | 8.014638000  | -7.251519000 | 4.451879000  |
| C | 8.460017000  | -7.806183000 | 5.638522000  |
| C | 7.747294000  | -7.544440000 | 6.797762000  |
| H | -1.766973000 | -5.069596000 | 4.759624000  |
| H | 0.884394000  | -5.087937000 | 4.811044000  |
| H | 4.671124000  | -1.342250000 | 4.673468000  |
| H | 4.687793000  | 1.312096000  | 4.677205000  |
| H | 0.947984000  | 5.104882000  | 4.832849000  |
| H | -1.703235000 | 5.119549000  | 4.782095000  |
| H | -5.479128000 | 1.374230000  | 5.036358000  |
| H | -5.495506000 | -1.279282000 | 5.028208000  |
| H | 4.382930000  | 3.246142000  | 1.590657000  |
| H | 2.809048000  | 4.012317000  | -2.307130000 |
| H | 4.421298000  | 5.865435000  | -2.516868000 |
| H | 6.521415000  | 6.714854000  | -2.684933000 |
| H | 7.938568000  | 8.737774000  | -2.613880000 |
| H | 7.285372000  | 8.885095000  | 1.614812000  |
| H | 8.323129000  | 9.865966000  | -0.417350000 |
| H | 2.985109000  | 4.419702000  | 3.099010000  |
| H | 3.515650000  | 2.764505000  | 7.002865000  |
| H | 5.362872000  | 4.358579000  | 7.352269000  |
| H | 6.146989000  | 6.460064000  | 7.637802000  |
| H | 8.154430000  | 7.894380000  | 7.757851000  |
| H | 9.434235000  | 8.357573000  | 5.661048000  |
| H | 8.610928000  | 7.380036000  | 3.532675000  |
| H | 3.467963000  | -2.793879000 | 6.998245000  |
| H | 2.942333000  | -4.414954000 | 3.079369000  |
| H | 4.359040000  | -3.249838000 | 1.576090000  |
| H | 2.776346000  | -4.003725000 | -2.320610000 |
| H | 4.373422000  | -5.869903000 | -2.531053000 |
| H | 7.209630000  | -8.915358000 | 1.600719000  |
| H | 8.239032000  | -9.905273000 | -0.431280000 |
| H | 7.864846000  | -8.773635000 | -2.627854000 |
| H | 6.466101000  | -6.737942000 | -2.698972000 |
| H | 5.295806000  | -4.410661000 | 7.346679000  |
| H | 6.055189000  | -6.525098000 | 7.619997000  |

|   |             |              |             |
|---|-------------|--------------|-------------|
| H | 8.541248000 | -7.425683000 | 3.523809000 |
| H | 9.342016000 | -8.429238000 | 5.648760000 |
| H | 8.050625000 | -7.976291000 | 7.740647000 |

Coordinates of Co<sub>2</sub>Ag<sub>4</sub> Optimized Structure:

|    |                   |                   |                   |
|----|-------------------|-------------------|-------------------|
| Ag | 16.91456180061173 | 9.59836659584698  | -2.00383791815975 |
| Ag | 13.73659499886531 | 15.10211732204602 | 8.30094275718063  |
| Co | 10.01769884416324 | 15.02603145474824 | 0.06400024188920  |
| N  | 8.86403184915502  | 16.26382887937543 | -0.95523345406838 |
| N  | 9.49857195820789  | 15.92180499321971 | 1.74548562317373  |
| N  | 10.53070638980725 | 14.11801842472820 | -1.61231945058434 |
| N  | 11.14656874696920 | 13.77588265508424 | 1.08249071481300  |
| N  | 17.69732759001080 | 11.71776898722987 | -1.46873318878545 |
| N  | 18.98121609352717 | 9.82669543582066  | -3.01103108651958 |
| N  | 16.08766804228183 | 7.52978122219577  | -1.64561845115055 |
| N  | 14.52367703221657 | 9.80962501324804  | -1.88625658349939 |
| N  | 15.14550313311387 | 16.14509705243758 | 6.79604105317292  |
| N  | 15.09623486755039 | 16.52795772715296 | 9.52393773691167  |
| N  | 12.67765747678842 | 13.42297794963509 | 9.35697461367716  |
| N  | 11.77073389695818 | 14.56990706638538 | 6.99599994337235  |
| C  | 8.60489841706426  | 16.24464536204491 | -2.31220720801824 |
| C  | 8.62237261898770  | 16.97797613460061 | 1.89469764599916  |
| C  | 8.48868363424045  | 17.32633098927931 | 3.27898386930257  |
| C  | 9.87369496082214  | 15.58594892319386 | 3.03350518868225  |
| C  | 9.24424354258378  | 16.45407553290766 | 3.98200895538617  |
| C  | 10.70284363109592 | 14.53840742632977 | 3.38519488396924  |
| C  | 11.33392407566265 | 13.73498570215697 | 2.45091200166620  |
| C  | 12.25980535881729 | 12.70012901064863 | 2.79804636828763  |
| C  | 12.61428003135011 | 12.08283413515191 | 1.64794352210948  |
| C  | 11.90836106354731 | 12.73490413265387 | 0.58705462392466  |
| C  | 11.97341983993202 | 12.32888830229633 | -0.73476129759192 |
| C  | 11.35074645528486 | 13.01422486635592 | -1.76003688634044 |
| C  | 11.43704640903495 | 12.63409113495831 | -3.13755331519207 |
| C  | 10.67661595740269 | 13.50529281081710 | -3.83661514916586 |
| C  | 10.09090569177289 | 14.40713340722033 | -2.88842902047253 |
| C  | 9.16306575026388  | 15.37595649934886 | -3.23006396154876 |
| C  | 7.61262671937261  | 17.22095173673404 | -2.64836453602644 |
| C  | 7.26248904730815  | 17.84115586242660 | -1.49941483283905 |
| C  | 8.03716486702350  | 17.24893961936061 | -0.45058105872140 |
| C  | 7.90455471815057  | 17.58982670092912 | 0.88163173598832  |
| C  | 17.09028634223672 | 14.02802465711520 | -1.26767215737977 |
| C  | 16.88182284018015 | 12.67678751242740 | -1.02752366118612 |
| C  | 18.25553967155592 | 14.37979164960329 | -1.94499336718441 |
| C  | 18.80818704793995 | 12.05769914362623 | -2.14728020376749 |
| C  | 19.12323742669477 | 13.39469839733459 | -2.37471679970731 |
| C  | 19.63067728870378 | 10.96098983345477 | -2.69129821995187 |
| C  | 21.00196304548501 | 11.09069220466058 | -2.88764931596333 |

|   |                   |                   |                   |
|---|-------------------|-------------------|-------------------|
| C | 21.71007683929087 | 10.03789201911153 | -3.44167202736755 |
| C | 19.66950117738493 | 8.81833584436079  | -3.55260398820463 |
| C | 21.03150450225035 | 8.88150650557063  | -3.79168677512678 |
| C | 13.87380071920509 | 10.95818074629182 | -1.68476659206507 |
| C | 12.65401733807948 | 11.04336487338316 | -1.02371587593271 |
| C | 12.08279601841761 | 9.84678520975804  | -0.59484236197808 |
| C | 12.73509337373608 | 8.65187742587649  | -0.82182694331850 |
| C | 13.97138074018618 | 8.65913803992121  | -1.46297604052990 |
| C | 14.74626414742430 | 7.41726294133403  | -1.65045651681507 |
| C | 14.12801020179901 | 6.17982404425287  | -1.80236932752101 |
| C | 14.90483525310018 | 5.04110501568166  | -1.92785503878709 |
| C | 16.28480360627639 | 5.16178260450002  | -1.89385583292758 |
| C | 16.83228429993441 | 6.42497429961480  | -1.75790196029360 |
| C | 10.85060739798290 | 14.17283551169774 | 4.81450886199476  |
| C | 10.26759104092382 | 13.00044004970931 | 5.29164170311646  |
| C | 11.57883942372137 | 14.93000034164002 | 5.72520590748233  |
| C | 14.87390728222921 | 16.16965709011768 | 5.49015030332728  |
| C | 15.26404602214506 | 17.20144739685625 | 4.64729784121608  |
| C | 16.04137751739946 | 18.21459251586020 | 5.20343649883264  |
| C | 16.35601309015435 | 18.17886104664753 | 6.54801757976576  |
| C | 15.87029340899699 | 17.14067578635641 | 7.33832695955186  |
| C | 16.06582539024456 | 17.11629658311925 | 8.80009482691516  |
| C | 15.19832101736668 | 16.51878102933744 | 10.85528984930882 |
| C | 16.26819722221542 | 17.08088268421724 | 11.53055201867363 |
| C | 17.28156302067914 | 17.66723306312503 | 10.78935454869440 |
| C | 17.17884806879487 | 17.68774057204356 | 9.40879705670031  |
| C | 11.21234631144558 | 13.43356255467954 | 7.44807073641662  |
| C | 10.43893487081927 | 12.63319578263347 | 6.61090619092833  |
| C | 11.49510423646013 | 13.03784592293230 | 8.84145817088632  |
| C | 10.59664629264774 | 12.28161443686314 | 9.58816092888006  |
| C | 13.00026794335435 | 13.04161869981283 | 10.59749668704898 |
| C | 12.16336663153746 | 12.27528017632626 | 11.38851899710643 |
| C | 10.93269150990622 | 11.89862051009703 | 10.87510525581531 |
| H | 7.88112742767559  | 18.12631359885954 | 3.66227929921897  |
| H | 9.36509758369009  | 16.39799264107424 | 5.04903256636287  |
| H | 12.60067309010664 | 12.48295739014252 | 3.79465916261903  |
| H | 13.30018775976115 | 11.26376459769305 | 1.52451433765390  |
| H | 12.00528318421283 | 11.80380306565248 | -3.51723090590805 |
| H | 10.51276800962113 | 13.52846628030625 | -4.89897504995801 |
| H | 7.21512060177109  | 17.38609697216654 | -3.63395852290124 |
| H | 6.52371983936078  | 18.61104786187454 | -1.36469305785402 |
| H | 16.01557472264183 | 12.35099381378475 | -0.46760170652129 |
| H | 18.46459484452954 | 15.42005908728753 | -2.15148991412582 |
| H | 20.01150631312274 | 13.66191476143223 | -2.92680806197924 |
| H | 21.51691164312533 | 11.99142597974293 | -2.58852225790387 |
| H | 22.77681847552821 | 10.11840394205185 | -3.59374985129376 |
| H | 19.09908289073016 | 7.93748454860024  | -3.81396484467053 |
| H | 21.54377005069623 | 8.04259241804873  | -4.23904563600408 |



|    |                   |                   |                   |
|----|-------------------|-------------------|-------------------|
| H  | 14.35163069938049 | 11.85272483425880 | -2.06285337231129 |
| H  | 11.13618754113567 | 9.86114855909328  | -0.07303101056947 |
| H  | 12.30704780277028 | 7.72736994057295  | -0.46518029219640 |
| H  | 13.05173149462879 | 6.10685557601559  | -1.84773526714469 |
| H  | 14.43899230465261 | 4.07434889586561  | -2.05395038054833 |
| H  | 16.92758297201000 | 4.29767306581203  | -1.97353401474157 |
| H  | 17.90351712757812 | 6.56673358901476  | -1.72329224901321 |
| H  | 9.69429257879866  | 12.37564008035420 | 4.62125704749908  |
| H  | 12.03264767442823 | 15.86305392880111 | 5.41680704587375  |
| H  | 14.30788468495768 | 15.33423066330981 | 5.10091770161627  |
| H  | 16.37639892600987 | 19.03682021003483 | 4.58673902402566  |
| H  | 16.93222560144540 | 18.97885020603371 | 6.98753159688124  |
| H  | 14.38279956281703 | 16.05459804600055 | 11.39310787450706 |
| H  | 16.30330926425402 | 17.05573220863296 | 12.60966411566152 |
| H  | 18.14272323400170 | 18.09942674001937 | 11.27838628290667 |
| H  | 17.96909074843612 | 18.12128224917555 | 8.81414537260880  |
| H  | 10.01041262216762 | 11.71129773816797 | 6.97372309581427  |
| H  | 9.63347509032285  | 12.01537277848953 | 9.17941724274862  |
| H  | 13.97087284309981 | 13.35583433297288 | 10.95507239969329 |
| H  | 12.47129360939724 | 11.98568185982151 | 12.38223893692758 |
| H  | 10.24192636225843 | 11.31772220039892 | 11.46917434496050 |
| Ag | 7.08835082882222  | 23.04731893235778 | 2.00026855176337  |
| Ag | 10.24098634677769 | 17.52795821155846 | -8.29740446854255 |
| Co | 13.97301876562423 | 17.60915332152405 | -0.06093718365302 |
| N  | 15.12686743830483 | 16.37216317315241 | 0.95909405862566  |
| N  | 14.49347208653155 | 16.71361398444561 | -1.74210554262475 |
| N  | 13.46040328254165 | 18.51835890000257 | 1.61486568702441  |
| N  | 12.84519925321666 | 18.85949132659504 | -1.08038398511554 |
| N  | 6.30392177626342  | 20.92552065567122 | 1.46774555950519  |
| N  | 5.02214834879121  | 22.82262725179663 | 3.00452147575317  |
| N  | 7.91516468445636  | 25.11635980184337 | 1.63311244200387  |
| N  | 9.47634013178269  | 22.83590523165293 | 1.88169269168545  |
| N  | 8.83614788951445  | 16.48397800186483 | -6.79277313636597 |
| N  | 8.88136285304974  | 16.09823853457655 | -9.52015150175748 |
| N  | 11.30472829536344 | 19.20048629297921 | -9.35453190407920 |
| N  | 12.21329350358466 | 18.05581374916969 | -6.99196715264872 |
| C  | 15.38362567956155 | 16.39011383331535 | 2.31652636101918  |
| C  | 15.37274463059384 | 15.65999443805242 | -1.89099521894066 |
| C  | 15.50694179008513 | 15.31109436767736 | -3.27509594386825 |
| C  | 14.11668692247991 | 17.04737630372037 | -3.03020267306646 |
| C  | 14.74818258621416 | 16.18036884402186 | -3.97837133168160 |
| C  | 13.28577050180383 | 18.09331891933525 | -3.38244710284567 |
| C  | 12.65596112902290 | 18.89822144784432 | -2.44864252982415 |
| C  | 11.73177912719289 | 19.93438547677269 | -2.79639378460658 |
| C  | 11.38049469831397 | 20.55477420655620 | -1.64698500932373 |
| C  | 12.08620595964583 | 19.90286245343204 | -0.58584181504076 |
| C  | 12.02278055110861 | 20.31062543395611 | 0.73549577182461  |
| C  | 12.64320933996357 | 19.62439015625027 | 1.76149478976422  |

|                     |                   |                    |
|---------------------|-------------------|--------------------|
| C 12.55599175366230 | 20.00471320178736 | 3.13888592359543   |
| C 13.31279382764841 | 19.13121133733173 | 3.83901013131006   |
| C 13.89778268469492 | 18.22809242412630 | 2.89157786834647   |
| C 14.82386797031574 | 17.25793410652547 | 3.23423605389020   |
| C 16.37622470617990 | 15.41435288207863 | 2.65337443097742   |
| C 16.72987006350866 | 14.79659108102552 | 1.50419122807935   |
| C 15.95638903809377 | 15.38916804204040 | 0.45469587785137   |
| C 16.09152245510453 | 15.04983980402230 | -0.87760417594750  |
| C 6.90822707309840  | 18.61401918623750 | 1.27178962329658   |
| C 7.11800759083181  | 19.96451634575267 | 1.02830554070990   |
| C 5.74334156533414  | 18.26529244872364 | 1.95134814458468   |
| C 5.19332349730529  | 20.58847867533450 | 2.14809967648330   |
| C 4.87718092424423  | 19.25241030985902 | 2.37951731103702   |
| C 4.37193130145131  | 21.68752116611315 | 2.68912411067209   |
| C 3.00069932324408  | 21.55935949528966 | 2.88685901959815   |
| C 2.29352463271021  | 22.61449030672101 | 3.43762973199075   |
| C 4.33477698103797  | 23.83337100189285 | 3.54286677592342   |
| C 2.97291297220642  | 23.77178934693162 | 3.78302139497949   |
| C 10.12475693584790 | 21.68600834933860 | 1.68308313418808   |
| C 11.34475280908704 | 21.59779746473430 | 1.02293283822683   |
| C 11.91810814597638 | 22.79269963146948 | 0.59223727251070   |
| C 11.26738347143216 | 23.98898856519562 | 0.81641876903510   |
| C 10.03047425255618 | 23.98477684646504 | 1.45635959905174   |
| C 9.25662242218425  | 25.22787232226973 | 1.63963020870861   |
| C 9.87578836764777  | 26.46517521751079 | 1.78890691207269   |
| C 9.09972077857463  | 27.60490027266883 | 1.90990391334946   |
| C 7.71971087006799  | 27.48527709295865 | 1.87396203175907   |
| C 7.17136688272040  | 26.22212812184310 | 1.74086478349663   |
| C 13.13609750472783 | 18.45647238856885 | -4.81221629463195  |
| C 13.71919404059168 | 19.62767703097142 | -5.29212077635566  |
| C 12.40636328546935 | 17.69804808869495 | -5.72071651515714  |
| C 9.10916753785404  | 16.46150624299085 | -5.48711076354923  |
| C 8.72040665445944  | 15.43075666018139 | -4.64239896670226  |
| C 7.94320190671881  | 14.41629004141740 | -5.19630259112268  |
| C 7.62662828109521  | 14.45022307689803 | -6.54047286903835  |
| C 8.11099845181088  | 15.48744031687042 | -7.33285933859823  |
| C 7.91322503775364  | 15.51004113099239 | -8.79435177708807  |
| C 8.77737078300899  | 16.10592378144443 | -10.85130822458969 |
| C 7.70694598592662  | 15.54229057567930 | -11.52448426167265 |
| C 6.69506899891988  | 14.95600610705076 | -10.78121243220201 |
| C 6.79974350860754  | 14.93704915476596 | -9.40077006414574  |
| C 12.77193081056676 | 19.19091997837581 | -7.44667050785297  |
| C 13.54661962047454 | 19.99256821896212 | -6.61187718635831  |
| C 12.48848818755854 | 19.58424523691562 | -8.84063678868725  |
| C 13.38771025697425 | 20.33739644746133 | -9.58952461728021  |
| C 10.98184301556474 | 19.58030449321316 | -10.59554536538526 |
| C 11.81958118765074 | 20.34355528993782 | -11.38860040578182 |
| C 13.05141596580478 | 20.71871675825646 | -10.87688414710443 |

|   |                   |                   |                    |
|---|-------------------|-------------------|--------------------|
| H | 16.11699463067391 | 14.51288074447706 | -3.65812232079272  |
| H | 14.62639478693561 | 16.23517980873330 | -5.04535835593688  |
| H | 11.39000216546810 | 20.15042365677575 | -3.79294483667941  |
| H | 10.69673097381957 | 21.37572835205369 | -1.52413816597514  |
| H | 11.98943730591507 | 20.83650298714409 | 3.51780162389890   |
| H | 13.47480538963932 | 19.10736865346907 | 4.90162614843946   |
| H | 16.77188307350085 | 15.24828283885196 | 3.63955772721710   |
| H | 17.46998164405386 | 14.02791529497877 | 1.36981410548992   |
| H | 7.98409850424252  | 20.28797165811281 | 0.46676507893188   |
| H | 5.53322925231187  | 17.22577606825507 | 2.16052660205149   |
| H | 3.98927009561156  | 18.98753661875819 | 2.93331331841508   |
| H | 2.48504181412522  | 20.65787962668301 | 2.59124000371542   |
| H | 1.22683897019974  | 22.53509079663997 | 3.59067910449833   |
| H | 4.90589662157043  | 24.71482109119662 | 3.80064174781354   |
| H | 2.46137289841848  | 24.61260042231683 | 4.22763518016141   |
| H | 9.64531128440933  | 20.79296263752949 | 2.06259098898725   |
| H | 12.86487340048607 | 22.77586344449431 | 0.07078559056533   |
| H | 11.69702900495447 | 24.91219245979133 | 0.45833194408243   |
| H | 10.95206288861888 | 26.53737125958233 | 1.83570594263663   |
| H | 9.56617142005011  | 28.57162577956342 | 2.03397583011553   |
| H | 7.07754759608688  | 28.35017724638023 | 1.94998405102794   |
| H | 6.10006642361270  | 26.08126119657449 | 1.70485695602806   |
| H | 14.29346430716185 | 20.25344490220186 | -4.62347011985846  |
| H | 11.95254603619676 | 16.76571996534056 | -5.41002815128079  |
| H | 9.67454751798941  | 17.29812221131455 | -5.09958307670958  |
| H | 7.60884831327660  | 13.59502758618899 | -4.57795684256618  |
| H | 7.05078408099779  | 13.64906582136005 | -6.97832593935312  |
| H | 9.59176677102480  | 16.57015806642982 | -11.39080919616916 |
| H | 7.67024857083233  | 15.56627863650827 | -12.60357150039295 |
| H | 5.83355244024657  | 14.52261990375765 | -11.26856024117743 |
| H | 6.01058868911621  | 14.50366089644968 | -8.80455910253703  |
| H | 13.97518394084298 | 20.91360010070063 | -6.97685657345944  |
| H | 14.35171930521209 | 20.60245169999230 | -9.18199680863129  |
| H | 10.01034859162434 | 19.26735872342881 | -10.95176627429562 |
| H | 11.51137918911618 | 20.63193515099903 | -12.38258658225933 |
| H | 13.74282511276592 | 21.29721592486025 | -11.47254224686844 |

## Reference:

- (1) Galloway, J. D.; Mai, D. N.; Baxter, R. D. Radical Benzoylation of Quinones via C–H Abstraction. *J. Org. Chem.* **2019**, *84* (18), 12131-12137. DOI: 10.1021/acs.joc.9b01004.
- (2) Crawley, M. R.; Zhang, D.; Oldacre, A. N.; Beavers, C. M.; Friedman, A. E.; Cook, T. R. Tuning the Reactivity of Cofacial Porphyrin Prisms for Oxygen Reduction Using Modular Building Blocks. *J. Am. Chem. Soc.* **2021**, *143* (2), 1098-1106. DOI: 10.1021/jacs.0c11895.
